# Supplementary material for: Cyclopalladation of telluro ether ligands: synthesis, reactivity and structural characterization
Source: Royal Society of Chemistry journal article supplement (doi:10.1039/c4dt02200a), 2014-01-01
Supplement: c4dt02200a1.pdf [file c4dt02200a1.pdf]

## Cyclopalladation of telluro ether ligands: synthesis, reactivity and structural characterization

Siddhartha Kolay, Mukesh Kumar, Amey Wadawale, Dasarathi Das and Vimal K. Jain

### Preparation of dimesitylditelluride (Mes<sub>2</sub>Te<sub>2</sub>)

To a THF solution of mesityl magnesium bromide (prepared from mesityl bromide (20.82 g, 104 mmol) and magnesium turnings (2.52 g, 104 mmol) in 50 cm<sup>3</sup> THF), a freshly grind tellurium powder (13.34 g, 104 mmol) was added under a nitrogen atmosphere with stirring which continued overnight. The contents were exposed to air for two hrs with stirring and the solvent was evaporated under reduced pressure. The residue was extracted with diethylether (3 × 50 cm<sup>3</sup>) and filtered. The filtrate was concentrated to 50 cm<sup>3</sup> which on slow evaporation afforded red crystals (15.00 g, 58%); m.p. 120°C (literature<sup>1</sup> 125-127°C). <sup>125</sup>Te {<sup>1</sup>H} NMR (CDCl<sub>3</sub>) δ = 200.3 ppm.

Similarly diphenylditelluride [Ph<sub>2</sub>Te<sub>2</sub>, (62%); m.p. 62°C; <sup>125</sup>Te {<sup>1</sup>H} NMR (CDCl<sub>3</sub>) δ = 421.5 ppm] and di-*o*-tolylditelluride [Te<sub>2</sub>(*o*-tol)<sub>2</sub>], (54%); <sup>125</sup>Te {<sup>1</sup>H} NMR (CDCl<sub>3</sub>) δ = 282.1 ppm] were prepared.

### Preparation of dimesityl telluride (Mes<sub>2</sub>Te)

To an ice cold solution (50 cm<sup>3</sup>) of dimesitylditelluride (2.5 g, 5.06 mmol) bromine (0.261 ml) in 5 cm<sup>3</sup> toluene was added dropwise. To this MesTeBr solution, a THF solution of MesMgBr (0.5M, 25ml) was added dropwise with stirring whereupon a colorless solution was formed. After one hour of stirring at room temperature, water (50 cm<sup>3</sup>) was introduced to the reaction flask. The organic layer was evaporated under reduced pressure and the aqueous phase was extracted with diethyl ether (20 cm<sup>3</sup> × 4) and the combined ether extracts were washed with aqueous NH<sub>4</sub>Cl followed by saturated aqueous NaCl. The organic phase was dried over anhydrous MgSO<sub>4</sub> for 2 hr. The contents were filtered and concentrated under vacuum to give colourless crystals of the title compound (3.12g, 84% yield), m.p 110°C (literature<sup>1</sup> 123-125 °C). Anal.Cald for C<sub>18</sub>H<sub>22</sub>Te: C, 59.07; H, 6.06%. Found, C, 58.21; H, 5.89%. <sup>1</sup>H NMR (CDCl<sub>3</sub>) δ: 2.28 (s, Me-4); 2.39 (s, 2,6-Me); 6.91(s, 3,5-CH). <sup>13</sup>C {<sup>1</sup>H} NMR (CDCl<sub>3</sub>) δ: 20.8 (s, 4-Me); 28.2 (s, 2,6-Me); 119.1 (Te-C), 127.8 (3,5-CH); 137.9,144.2 ppm. <sup>125</sup>Te {<sup>1</sup>H} NMR (CDCl<sub>3</sub>) δ = 260.8 ppm (NMR data were consistent with literature<sup>2</sup>).

### Diphenyl telluride (Ph<sub>2</sub>Te)

Prepared similar to dimesityl telluride employing PhTeBr and PhMgBr. The product was purified by converting into Ph<sub>2</sub>TeBr<sub>2</sub>, by oxidation of crude Ph<sub>2</sub>Te with bromine, which was recrystallized from toluene as yellow crystals. The latter was reduced with Na<sub>2</sub>S.15H<sub>2</sub>O in refluxing methanol for 15 min. The contents were diluted with water and methanol was evaporated under reduced pressure. The aqueous phase was extracted with diethyl ether (4 × 20 cm<sup>3</sup>) and after processing gave cream colored oily liquid in 66% yield. Anal.Cald.for

C<sub>12</sub>H<sub>10</sub>Te: C, 51.14; H, 3.58%. Found, C, 50.55; H, 3.46%. <sup>1</sup>H NMR (CDCl<sub>3</sub>) δ: 7.23-7.36(m), 7.74-7.77(m)(Ph). <sup>13</sup>C{<sup>1</sup>H} NMR (CDCl<sub>3</sub>) δ: 114.8 (C-Te), 127.9, 129.6, 138.0 ppm. <sup>125</sup>Te {<sup>1</sup>H} NMR (CDCl<sub>3</sub>) δ = 693.4 ppm.

#### **Di-*o*-tolyltelluride (*o*-tol<sub>2</sub>Te)**

Prepared and purified similar to diphenyl telluride and isolated as a cream colored liquid in 60% yield. Anal.Calc'd.for C<sub>14</sub>H<sub>14</sub>Te: C, 54.27; H, 4.55%. Found, C, 53.56; H, 4.53%. <sup>1</sup>H NMR (CDCl<sub>3</sub>) δ: 2.72(s, Me); 7.22(t, 6.8 Hz), 7.48(br, m), 7.82(d, 7.5 Hz). <sup>13</sup>C{<sup>1</sup>H} NMR (CDCl<sub>3</sub>) δ: 26.7 (Me), 119.0 (C-Te), 127.3, 128.8, 129.8, 138.5, 142.8 (C-2) ppm. <sup>125</sup>Te {<sup>1</sup>H} NMR (CDCl<sub>3</sub>) δ = 499.3 ppm.

#### **Mesityl(phenyl)telluride (MesTePh)**

This was prepared by treatment of MesTeBr (from Mes<sub>2</sub>Te<sub>2</sub> (5.0g, 10.0 mmol) and bromine (1.62g, 10.3 mmol) in THF) with PhMgBr (0.6 M, 40 cm<sup>3</sup>) and processed in a way similar to Ph<sub>2</sub>Te, and was isolated as a cream colored liquid (49% yield). <sup>1</sup>H NMR (CDCl<sub>3</sub>) δ: 2.36 (s, 4-Me); 2.60 (s, 2,6-Me); 7.06(s, 3,5-CH); 7.14-7.19(m); 7.36-7.39(m) (Ph). <sup>125</sup>Te{<sup>1</sup>H} NMR (CDCl<sub>3</sub>) δ = 427.2 ppm.

#### **Mesityl(*o*-tolyl)telluride (MesTe(*o*-tol))**

This was prepared from *o*-tolTeBr (from *o*-tol<sub>2</sub>Te<sub>2</sub> (5.0 g, 11.31mmol) and bromine (1.826 g, 11.57 mmol) in THF) and MesMgBr (0.5 M, 50 cm<sup>3</sup>) and processed in a way similar to dimesityl telluride, and isolated as a cream crystalline solid (5.2 g, 68% yield); m.p. 50°C. Anal.Calc'd.for C<sub>16</sub>H<sub>18</sub>Te: C, 56.87; H, 5.37%. Found, C, 56.00; H, 5.56%. <sup>1</sup>H NMR (CDCl<sub>3</sub>) δ: 2.47, 2.52, 2.70 (each s for Me); 6.97-7.29 (m, 3,5-CH of Mes, *o*-tol). <sup>13</sup>C{<sup>1</sup>H} NMR (CDCl<sub>3</sub>) δ: 21.0 (s), 24.8(s), 29.3(s),(Me); 117.8, 120.1, 126.4, 126.6, 127.6, 129.3, 132.9, 139.3, 140.2, 145.6 ppm. <sup>125</sup>Te {<sup>1</sup>H} NMR (CDCl<sub>3</sub>) δ = 336.8 ppm.

**Table S1. Crystallographic and structural determination data for *trans*-[PdCl<sub>2</sub>(TeMes<sub>2</sub>)<sub>2</sub>].2 MeCN, *trans*-[PdCl<sub>2</sub>(TeMes<sub>2</sub>)<sub>2</sub>].toluene, [Pd<sub>2</sub>(μ-Cl)<sub>2</sub>Cl<sub>2</sub>(TeMes<sub>2</sub>)<sub>2</sub>]. 2 acetone and *cis*-[PdCl<sub>2</sub>{MesTeCH<sub>2</sub>C<sub>6</sub>H<sub>2</sub>(4,6-Me<sub>2</sub>)TeMes}]**

|                                                              | <i>trans</i> -[PdCl <sub>2</sub> (TeMes <sub>2</sub> ) <sub>2</sub> ].2 MeCN                                                  | <i>trans</i> -[PdCl <sub>2</sub> (TeMes <sub>2</sub> ) <sub>2</sub> ].toluene                                                                   | [Pd <sub>2</sub> (μ-Cl) <sub>2</sub> Cl <sub>2</sub> (TeMes <sub>2</sub> ) <sub>2</sub> ]. 2acetone                                                        | <i>cis</i> -[PdCl <sub>2</sub> {MesTeCH <sub>2</sub> C <sub>6</sub> H <sub>2</sub> (4,6-Me <sub>2</sub> )TeMes}] |
|--------------------------------------------------------------|-------------------------------------------------------------------------------------------------------------------------------|-------------------------------------------------------------------------------------------------------------------------------------------------|------------------------------------------------------------------------------------------------------------------------------------------------------------|------------------------------------------------------------------------------------------------------------------|
| chemical formula                                             | <b>1a</b> . 2CH <sub>3</sub> CN<br>C <sub>36</sub> H <sub>44</sub> Cl <sub>2</sub> PdTe <sub>2</sub> .<br>2CH <sub>3</sub> CN | <b>1a</b> .C <sub>6</sub> H <sub>5</sub> Me<br>C <sub>36</sub> H <sub>44</sub> Cl <sub>2</sub> PdTe <sub>2</sub> .C <sub>7</sub> H <sub>8</sub> | <b>2a</b> .2 acetone<br>C <sub>36</sub> H <sub>44</sub> Cl <sub>4</sub> Pd <sub>2</sub> Te <sub>2</sub> .<br>C <sub>6</sub> H <sub>12</sub> O <sub>2</sub> | 4<br>C <sub>27</sub> H <sub>32</sub> Cl <sub>2</sub> PdTe <sub>2</sub>                                           |
| formula weight                                               | 991.32                                                                                                                        | 1001.35                                                                                                                                         | 1202.67                                                                                                                                                    | 789.03                                                                                                           |
| cryst size (mm <sup>3</sup> )                                | 0.15 0.05 x 0.02                                                                                                              | 0.1 x 0.1 x 0.05                                                                                                                                | 0.15 x 0.13 x 0.10                                                                                                                                         | 0.14 x 0.05 x 0.01                                                                                               |
| crysta system                                                | monoclinic                                                                                                                    | Triclinic                                                                                                                                       | monoclinic                                                                                                                                                 | Monoclinic                                                                                                       |
| space group                                                  | P2 <sub>1</sub> /n                                                                                                            | <i>P</i> -1                                                                                                                                     | P2 <sub>1</sub> /c                                                                                                                                         | P2 <sub>1</sub> /c                                                                                               |
| Radiation (wavelength Å)                                     | Cu K/α (1.5418)                                                                                                               | Cu K/α (1.5418)                                                                                                                                 | Cu K/α (1.5418)                                                                                                                                            | Mo K/α (0.71073)                                                                                                 |
| temperature (K)                                              | 298 (2)                                                                                                                       | 298 (2)                                                                                                                                         | 298 (2)                                                                                                                                                    | 298 (2)                                                                                                          |
| unit cell dimensions                                         |                                                                                                                               |                                                                                                                                                 |                                                                                                                                                            |                                                                                                                  |
| a (Å)                                                        | 8.8514(16)                                                                                                                    | 11.3836(8)                                                                                                                                      | 9.9444(3)                                                                                                                                                  | 12.8111(3)                                                                                                       |
| b (Å)                                                        | 10.3908(17)                                                                                                                   | 12.8965(7)                                                                                                                                      | 22.0756(8)                                                                                                                                                 | 19.8187(4)                                                                                                       |
| c (Å)                                                        | 23.3718(5)                                                                                                                    | 16.0242(9)                                                                                                                                      | 10.5502(4)                                                                                                                                                 | 12.0377(2)                                                                                                       |
| α (°)                                                        | 90.00                                                                                                                         | 87.937(5)                                                                                                                                       | 90.00                                                                                                                                                      | 90.00                                                                                                            |
| β (°)                                                        | 100.804(18)                                                                                                                   | 78.771(5)                                                                                                                                       | 95.709(3)                                                                                                                                                  | 114.103(10)                                                                                                      |
| γ (°)                                                        | 90.00                                                                                                                         | 67.794(6)                                                                                                                                       | 90.00                                                                                                                                                      | 90.00                                                                                                            |
| volume (Å <sup>3</sup> )                                     | 2111.47(7)                                                                                                                    | 2134.5(2)                                                                                                                                       | 2304.58(13)                                                                                                                                                | 2789.89(10)                                                                                                      |
| Z                                                            | 2                                                                                                                             | 2                                                                                                                                               | 2                                                                                                                                                          | 4                                                                                                                |
| ρ <sub>calcd</sub> (g cm <sup>-3</sup> )                     | 1.559                                                                                                                         | 1.558                                                                                                                                           | 1.733                                                                                                                                                      | 1.879                                                                                                            |
| μ (mm <sup>-1</sup> )/F(000)                                 | 15.596/ 976                                                                                                                   | 15.421/ 988                                                                                                                                     | 18.466/ 1176                                                                                                                                               | 2.920/ 1512                                                                                                      |
| limiting indices                                             | -9 ≤ <i>h</i> ≤ 10<br>-12 ≤ <i>k</i> ≤ 12<br>-28 ≤ <i>l</i> ≤ 28                                                              | -13 ≤ <i>h</i> ≤ 12<br>-14 ≤ <i>k</i> ≤ 15<br>-19 ≤ <i>l</i> ≤ 18                                                                               | -11 ≤ <i>h</i> ≤ 11<br>-26 ≤ <i>k</i> ≤ 26<br>-6 ≤ <i>l</i> ≤ 12                                                                                           | -16 ≤ <i>h</i> ≤ 15<br>-24 ≤ <i>k</i> ≤ 24<br>-15 ≤ <i>l</i> ≤ 15                                                |
| θ for data collection (°)                                    | 3.85 – 69.91                                                                                                                  | 2.81 – 70.04                                                                                                                                    | 4.01 – 69.90                                                                                                                                               | 1.74 – 26.39                                                                                                     |
| no. of reflns collected                                      | 3981                                                                                                                          | 7925                                                                                                                                            | 4259                                                                                                                                                       | 5696                                                                                                             |
| no. of independent reflns                                    | 3585                                                                                                                          | 5758                                                                                                                                            | 3132                                                                                                                                                       | 5053                                                                                                             |
| data/restraints/parameters                                   | 3981/0/221                                                                                                                    | 7925/0/447                                                                                                                                      | 4259 /0 /235                                                                                                                                               | 5696/ 0/ 298                                                                                                     |
| final <i>R</i> <sub>1</sub> , <i>wR</i> <sub>2</sub> indices | 0.0459/0.1302                                                                                                                 | 0.0507/0.1151                                                                                                                                   | 0.0674/ 0.1643                                                                                                                                             | 0.0238/ 0.0645                                                                                                   |
| <i>R</i> <sub>1</sub> , <i>wR</i> <sub>2</sub> (all data)    | 0.0504/0.1344                                                                                                                 | 0.0773/0.1281                                                                                                                                   | 0.0958/ 0.1747                                                                                                                                             | 0.0297/ 0.0755                                                                                                   |
| goodness of fit on <i>F</i> <sup>2</sup>                     | 1.130                                                                                                                         | 1.057                                                                                                                                           | 1.189                                                                                                                                                      | 1.176                                                                                                            |

**Table S2. Crystallographic and structural determination data for [Pd<sub>2</sub>(μ-OAc)<sub>2</sub>{CH<sub>2</sub>C<sub>6</sub>H<sub>2</sub>(4,6-Me<sub>2</sub>)TeMes}<sub>2</sub>].toluene, [Pd<sub>2</sub>(μ-OAc)<sub>2</sub>{CH<sub>2</sub>C<sub>6</sub>H<sub>2</sub>(4,6-Me<sub>2</sub>)Tetol-*o*}<sub>2</sub>] and [Pd(μ-OAc)(μ-TeMes)]<sub>4</sub>**

|                                                              | [Pd <sub>2</sub> (μ-OAc) <sub>2</sub> {CH <sub>2</sub> C <sub>6</sub> H <sub>2</sub> (4,6-Me <sub>2</sub> )TeMes} <sub>2</sub> ].toluene | [Pd <sub>2</sub> (μ-OAc) <sub>2</sub> {CH <sub>2</sub> C <sub>6</sub> H <sub>2</sub> (4,6-Me <sub>2</sub> )Tetol- <i>o</i> } <sub>2</sub> ] | [Pd(μ-OAc)(μ-TeMes)] <sub>4</sub>                                              |
|--------------------------------------------------------------|------------------------------------------------------------------------------------------------------------------------------------------|---------------------------------------------------------------------------------------------------------------------------------------------|--------------------------------------------------------------------------------|
|                                                              | <b>5a.toluene</b>                                                                                                                        | <b>5b</b>                                                                                                                                   | <b>6</b>                                                                       |
| chemical formula                                             | C <sub>40</sub> H <sub>48</sub> O <sub>4</sub> Pd <sub>2</sub> Te <sub>2</sub> .C <sub>7</sub> H <sub>8</sub>                            | C <sub>36</sub> H <sub>40</sub> O <sub>4</sub> Pd <sub>2</sub> Te <sub>2</sub>                                                              | C <sub>44</sub> H <sub>56</sub> O <sub>8</sub> Pd <sub>4</sub> Te <sub>4</sub> |
| Fw                                                           | 1152.92                                                                                                                                  | 1004.68                                                                                                                                     | 1648.89                                                                        |
| cryst size (mm <sup>3</sup> )                                | 0.20 x 0.15 x 0.10                                                                                                                       | 0.12 x 0.10 x 0.05                                                                                                                          | 0.18 x 0.05 x 0.05                                                             |
| crysta system                                                | Monoclinic                                                                                                                               | monoclinic                                                                                                                                  | triclinic                                                                      |
| space group                                                  | P2 <sub>1</sub> /n                                                                                                                       | P2 <sub>1</sub> /n                                                                                                                          | <i>P</i> -1                                                                    |
| Radiation                                                    | Cu K/α (1.5418)                                                                                                                          | Cu K/α (1.5418)                                                                                                                             | Cu K/α (1.5418)                                                                |
| temperature (K)                                              | 130.00(10)                                                                                                                               | 298(2)                                                                                                                                      | 298(2)                                                                         |
| unit cell dimensions                                         |                                                                                                                                          |                                                                                                                                             |                                                                                |
| a (Å)                                                        | 11.1936(3)                                                                                                                               | 12.2913(3)                                                                                                                                  | 8.2911(4)                                                                      |
| b (Å)                                                        | 33.0163(13)                                                                                                                              | 17.9732(5)                                                                                                                                  | 12.0292(5)                                                                     |
| c (Å)                                                        | 11.9487(3)                                                                                                                               | 16.5408(5)                                                                                                                                  | 13.7289(6)                                                                     |
| α (°)                                                        | 90.00                                                                                                                                    | 90.00                                                                                                                                       | 72.307(4)                                                                      |
| β (°)                                                        | 92.641(2)                                                                                                                                | 101.904(3)                                                                                                                                  | 72.599(4)                                                                      |
| γ (°)                                                        | 90.00                                                                                                                                    | 90.00                                                                                                                                       | 89.423(4)                                                                      |
| volume (Å <sup>3</sup> )                                     | 4411.2(2)                                                                                                                                | 3575.50(18)                                                                                                                                 | 1239.86(10)                                                                    |
| Z                                                            | 4                                                                                                                                        | 4                                                                                                                                           | 1                                                                              |
| ρ <sub>calcd</sub> (g cm <sup>-3</sup> )                     | 1.736                                                                                                                                    | 1.866                                                                                                                                       | 2.208                                                                          |
| μ (mm <sup>-1</sup> )/F(000)                                 | 17.127/ 2264                                                                                                                             | 21.018/ 1936                                                                                                                                | 30.102/ 776                                                                    |
| limiting indices                                             | -13 ≤ <i>h</i> ≤ 7<br>-33 ≤ <i>k</i> ≤ 39<br>-14 ≤ <i>l</i> ≤ 13                                                                         | -14 ≤ <i>h</i> ≤ 14<br>-21 ≤ <i>k</i> ≤ 20<br>-13 ≤ <i>l</i> ≤ 20                                                                           | -9 ≤ <i>h</i> ≤ 10<br>-14 ≤ <i>k</i> ≤ 14<br>-16 ≤ <i>l</i> ≤ 16               |
| θ for data collection (°)                                    | 3.94 – 70.24                                                                                                                             | 3.675 – 69.879                                                                                                                              | 3.56-70.07                                                                     |
| no. of reflns collected                                      | 8254                                                                                                                                     | 6614                                                                                                                                        | 4648                                                                           |
| no. of independent reflns                                    | 6016                                                                                                                                     | 4494                                                                                                                                        | 3616                                                                           |
| data/restraints/parameters                                   | 8254/37/490                                                                                                                              | 6614/ 0 /405                                                                                                                                | 4648/ 0/ 279                                                                   |
| final <i>R</i> <sub>1</sub> , <i>wR</i> <sub>2</sub> indices | 0.0739/0.1838                                                                                                                            | 0.0704/ 0.1732                                                                                                                              | 0.0376/ 0.0846                                                                 |
| <i>R</i> <sub>1</sub> , <i>wR</i> <sub>2</sub> (all data)    | 0.1009/0.2024                                                                                                                            | 0.1110/ 0.1972                                                                                                                              | 0.0600/ 0.0948                                                                 |
| goodness of fit on <i>F</i> <sup>2</sup>                     | 1.047                                                                                                                                    | 1.066                                                                                                                                       | 1.042                                                                          |

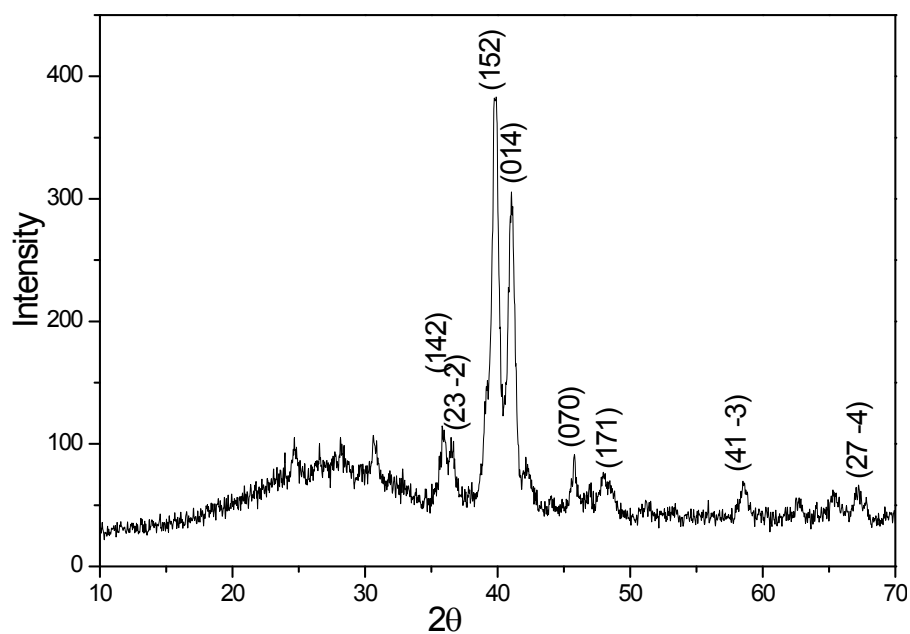

**Fig S1** XRD pattern of  $\text{Pd}_7\text{Te}_3$  obtained from  $\text{trans-}[\text{PdCl}_2(\text{TeMes}_2)_2]$  in refluxing xylene.

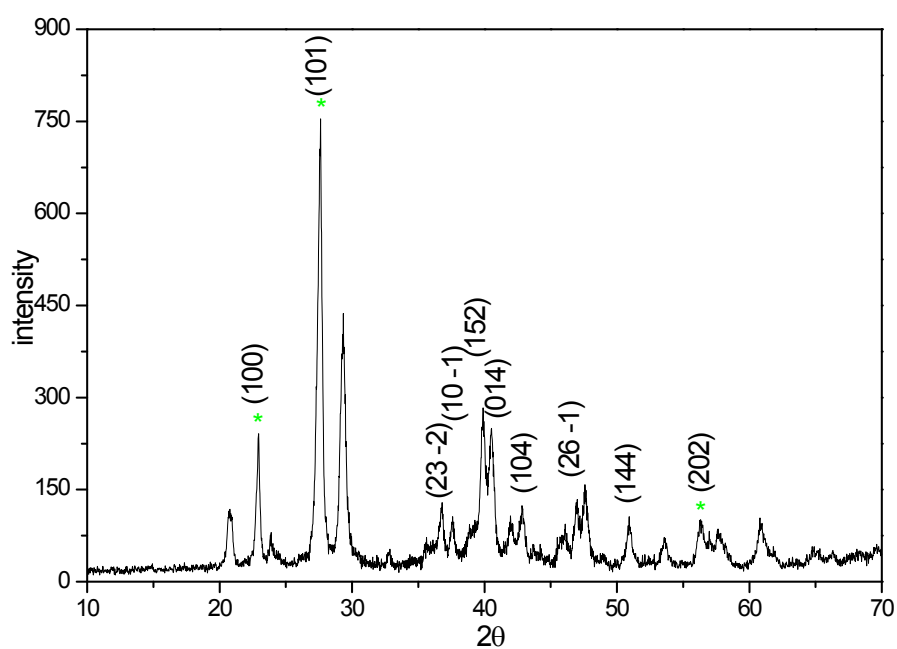

**Fig S2** XRD pattern of  $\text{Pd}_7\text{Te}_3$  obtained from  $\text{trans-}[\text{PdCl}_2(\text{TeMes}_2)_2]$  in refluxing 2-ethoxy ethanol. Peaks due to elemental tellurium are marked with \*.

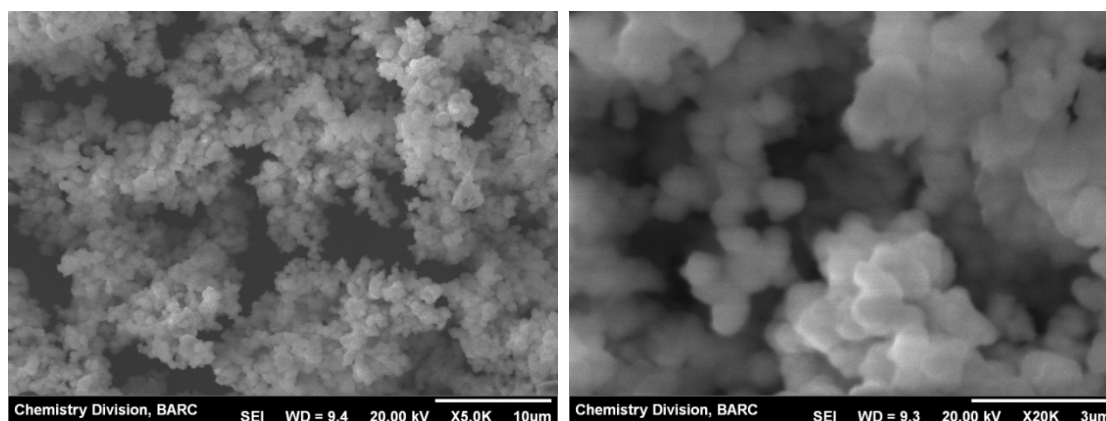

**Fig S3** SEM image of  $\text{Pd}_7\text{Te}_3$  obtained from  $\text{trans-}[\text{PdCl}_2(\text{TeMes}_2)_2]$  in refluxing xylene.

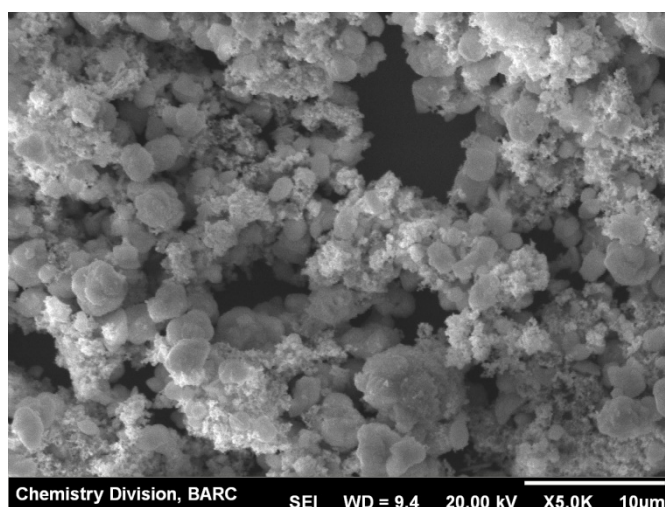

**Fig S4** SEM image of  $\text{Pd}_7\text{Te}_3$  obtained from  $\text{trans-}[\text{PdCl}_2(\text{TeMes}_2)_2]$  in refluxing 2-ethoxy ethanol.

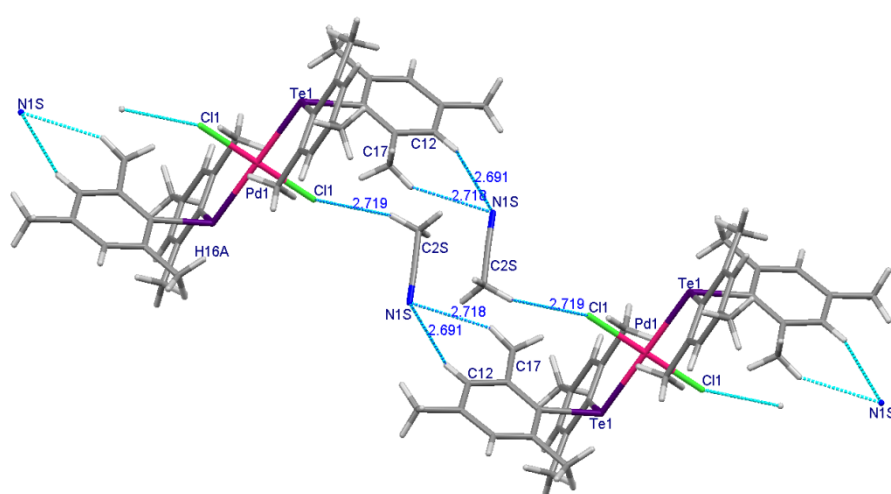

**Fig S5** Short interactions between solvent acetonitrile and  $\text{trans-}[\text{PdCl}_2(\text{TeMes}_2)_2]$  in  $\text{trans-}[\text{PdCl}_2(\text{TeMes}_2)_2] \cdot 2\text{CH}_3\text{CN}$  (**1a.2** acetonitrile)

## References

1. M. Akiba, M. V. Lakshmikantham, K. Y. Jen and M. P. Cava, *J. Org. Chem.* 1984, **49**, 4819.
2. T. M. Klapotke, B. Krumm, P. Mayer, K. Polborn and I. Schwab, *Z. Ang. Allg. Chem.* 2005, **631**, 2677.
